# Supplementary material for: Synthesis, Structure, and UV–Vis Characterization of Antimony(III) Phthalocyanine: [(SbPc)2(Sb2I8)(SbBr3)]2
Source: MDPI journal article supplement (doi:10.3390/molecules27061839), 2022-03-11
Supplement: s1 [file s1]

# Synthesis, structure, and UV-Vis characterization of antimony(III) phthalocyanine: $[(\text{SbPc})_2(\text{Sb}_2\text{I}_8)(\text{SbBr}_3)]_2$

Ryszard Kubiak and Jan Janczak\*

Institute of Low Temperature and Structure Research, Polish Academy of Sciences, Okólna 2, 50-422 Wrocław, Poland

\* Correspondence: j.janczak@intibs.pl

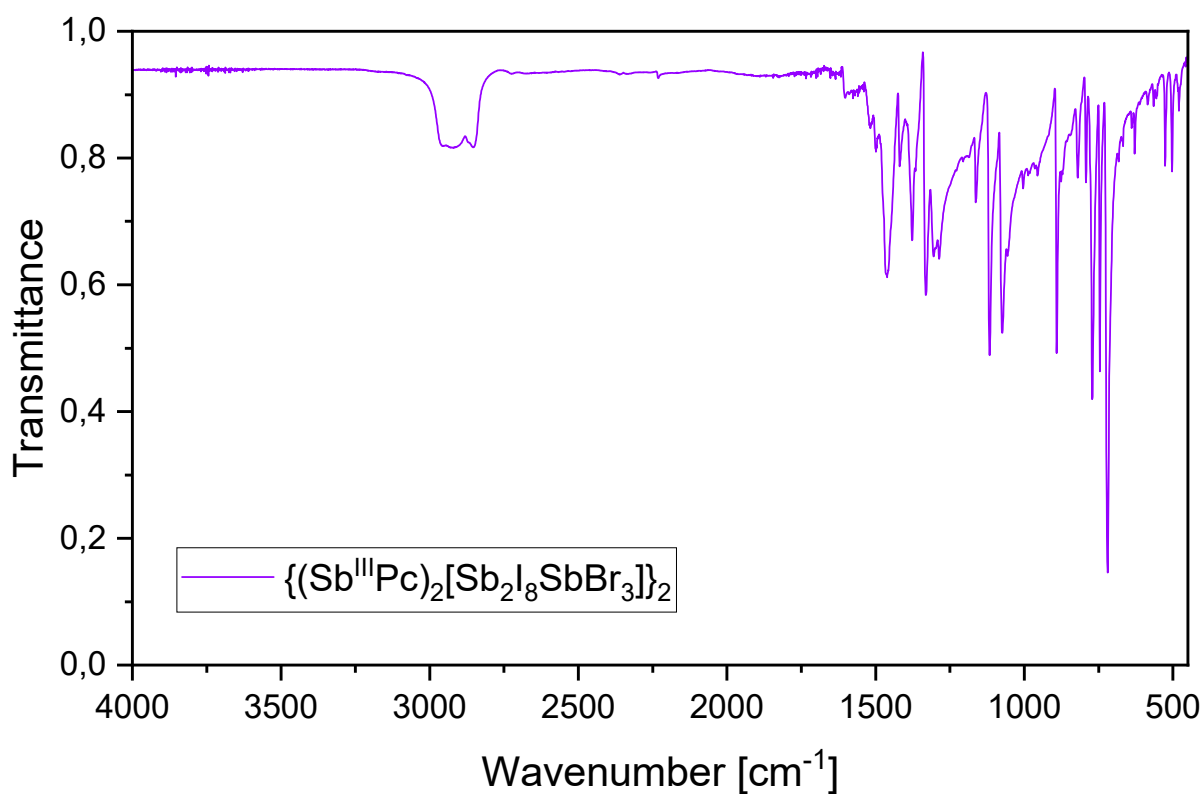

**Figure S1.** IR spectrum of  $\{(\text{Sb}^{\text{III}}\text{Pc})_2[\text{Sb}_2\text{I}_8\text{SbBr}_3]\}_2$  - (1) (nujol mull).

**Table S1.** Optimized parameters for (SbPc)<sup>+</sup> unit (Å, °).

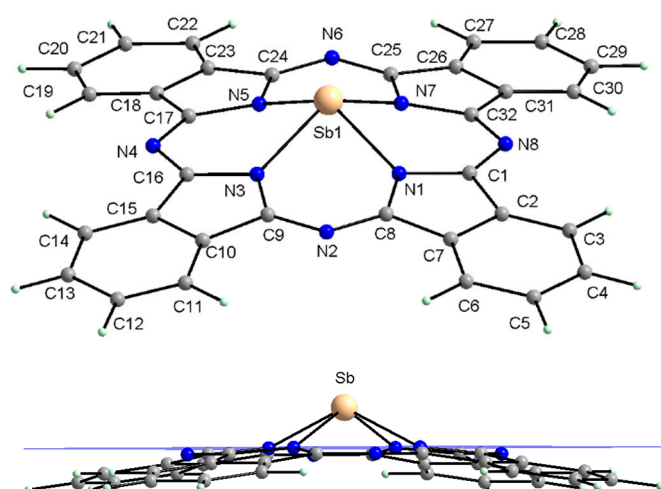

N<sub>4</sub>-isoindole (N1,N3,N5,N7) plane is marked in blue.

The displacement of Sb from N<sub>4</sub>-plane is 0.886 Å.

|                 |         |                 |         |                 |         |             |        |
|-----------------|---------|-----------------|---------|-----------------|---------|-------------|--------|
| Sb1–N1          | 2.206   | Sb1–N3          | 2.206   | Sb1–N5          | 2.206   | Sb1–N7      | 2.206  |
| N1–C1           | 1.442   | C1–C2           | 1.477   | C2–C3           | 1.419   | C3–C4       | 1.414  |
| C4–C5           | 1.428   | C5–C6           | 1.414   | C6–C7           | 1.419   | C7–C2       | 1.434  |
| C7–C8           | 1.477   | C8–N1           | 1.442   | C8–N2           | 1.383   | N2–C9       | 1.383  |
| C9–N3           | 1.442   | C9–C10          | 1.477   | C10–C11         | 1.419   | C11–C12     | 1.414  |
| C12–C13         | 1.428   | C13–C14         | 1.414   | C14–C15         | 1.419   | C15–C10     | 1.434  |
| C15–C16         | 1.477   | C16–N3          | 1.442   | C16–N4          | 1.383   | N4–C17      | 1.383  |
| C17–N5          | 1.442   | C17–C18         | 1.477   | C18–C19         | 1.414   | C19–C20     | 1.419  |
| C20–C21         | 1.428   | C21–C22         | 1.414   | C22–C23         | 1.419   | C23–C18     | 1.434  |
| C23–C24         | 1.477   | C24–N5          | 1.442   | C24–N6          | 1.383   | N6–C25      | 1.383  |
| C25–N7          | 1.442   | C25–C26         | 1.477   | C26–C27         | 1.419   | C27–C28     | 1.414  |
| C28–C29         | 1.428   | C29–C30         | 1.414   | C30–C31         | 1.419   | C31–C26     | 1.434  |
| C31–C32         | 1.477   | C32–N7          | 1.442   | C32–N8          | 1.383   | N8–C1       | 1.383  |
| C–H             | 1.106   |                 |         |                 |         |             |        |
| N1–Sb1–N3       | 80.71   | N3–Sb1–N5       | 80.71   | N5–Sb1–N7       | 80.71   | N7–Sb1–N1   | 80.71  |
| C1–N1–C8        | 108.24  | C8–N2–C9        | 119.06  | C9–N3–C16       | 108.24  | C16–N4–C17  | 119.07 |
| C17–N5–C18      | 108.24  | C24–N6–C25      | 119.05  | C25–N7–C26      | 108.24  | C32–N8–C1   | 119.06 |
| N1–C1–C2        | 108.09  | C1–C2–C3        | 131.15  | C2–C3–C4        | 117.64  | C3–C4–C5    | 121.31 |
| C4–C5–C6        | 121.31  | C5–C6–C7        | 117.64  | C6–C7–C8        | 131.15  | C7–C8–N2    | 122.10 |
| N2–C9–C10       | 122.09  | C9–C10–C11      | 131.15  | C10–C11–C12     | 117.64  | C11–C12–C13 | 121.31 |
| C12–C13–C14     | 121.32  | C13–C14–C15     | 117.64  | C14–C15–C16     | 131.17  | C15–C16–N4  | 122.10 |
| N4–C17–C18      | 122.09  | C17–C18–C19     | 131.15  | C18–C19–C20     | 117.63  | C19–C20–C21 | 121.31 |
| C20–C21–C22     | 121.31  | C21–C22–C23     | 117.64  | C22–C23–C24     | 131.17  | C23–C24–N6  | 122.10 |
| N6–C25–C26      | 122.09  | C25–C26–C27     | 131.15  | C26–C27–C28     | 117.64  | C27–C28–C29 | 121.31 |
| C28–C29–C30     | 121.31  | C29–C30–C31     | 117.64  | C30–C31–C32     | 131.17  | C31–C32–N8  | 122.10 |
| Sb1–N1–C1–C2    | 161.55  | Sb1–N3–C9–C10   | 161.60  | Sb1–N5–C17–C18  | 161.55  |             |        |
| Sb1–N7–C25–C26  | 161.61  | N1–C1–C2–C3     | 179.02  | C1–C2–C3–C4     | -179.17 |             |        |
| C2–C3–C4–C5     | 0.68    | C3–C4–C5–C6     | 0.00    | C4–C5–C6–C7     | -0.68   |             |        |
| C5–C6–C7–C8     | 179.16  | C6–C7–C8–N2     | -1.50   | C7–C8–N2–C9     | -170.77 |             |        |
| N2–C9–C19–C11   | 1.46    | C9–C10–C11–C1   | -179.16 | C10–C11–C12–C13 | 0.68    |             |        |
| C11–C12–C13–C14 | 0.00    | C12–C13–C14–C15 | -0.68   | C13–C14–C15–C16 | 179.16  |             |        |
| C14–C15–C16–N4  | -1.48   | C15–C16–N4–C17  | -170.76 | C16–N4–C17–C18  | 170.77  |             |        |
| N4–C17–C18–C19  | 1.48    | C17–C18–C19–C20 | -179.14 | C18–C19–C20–C21 | 0.68    |             |        |
| C19–C20–C21–C22 | 0.01    | C20–C21–C22–C23 | -0.68   | C21–C22–C23–C24 | 179.16  |             |        |
| C22–C23–C24–N6  | -1.52   | C23–C24–N6–C25  | -170.76 | C24–N6–C25–C26  | 170.75  |             |        |
| N6–C25–C26–C27  | 1.46    | C25–C26–C27–C28 | -179.18 | C26–C27–C28–C29 | 0.68    |             |        |
| C27–C28–C29–C30 | 0.00    | C28–C29–C30–C31 | -0.68   | C29–C30–C31–C32 | 179.16  |             |        |
| C30–C31–C32–N7  | -179.04 | C30–C31–C32–N8  | -1.48   | C31–C32–N8–C1   | -170.75 |             |        |
| C32–N8–C1–N1    | -6.19   |                 |         |                 |         |             |        |

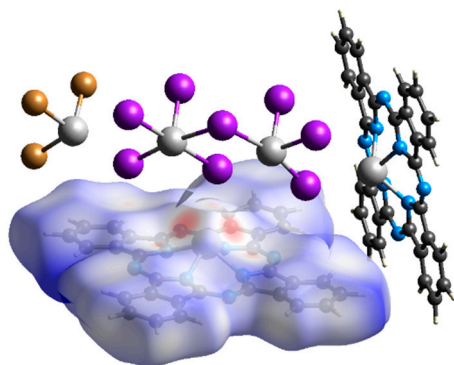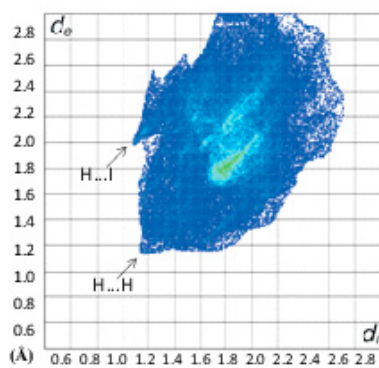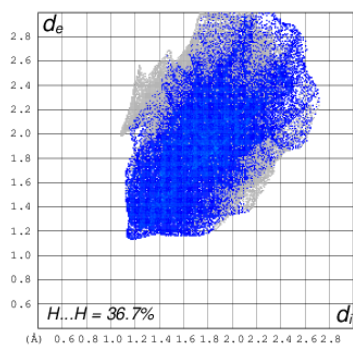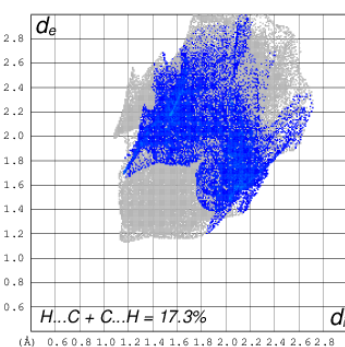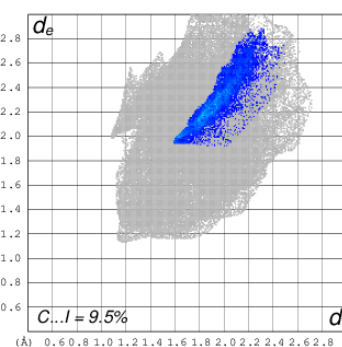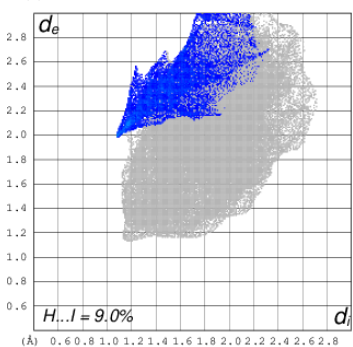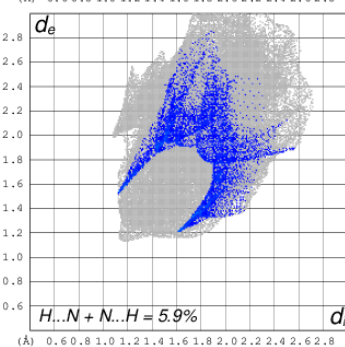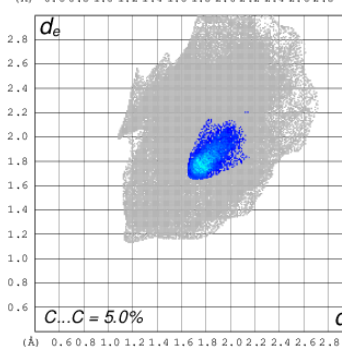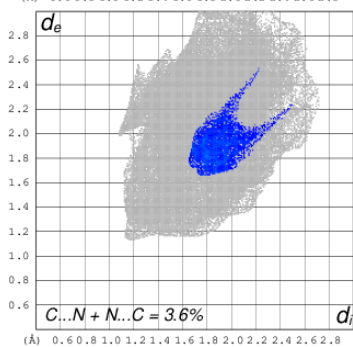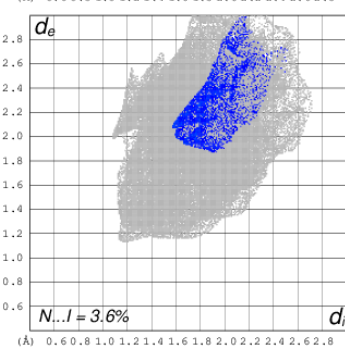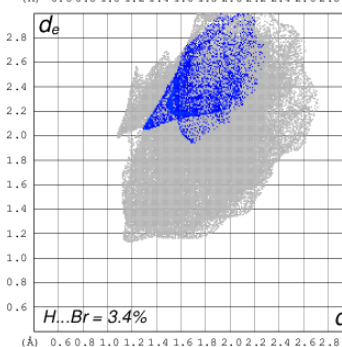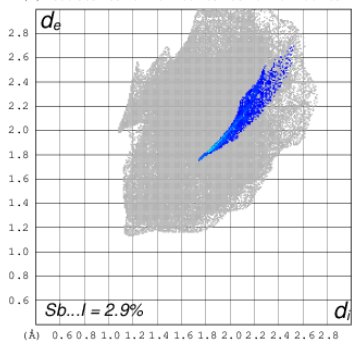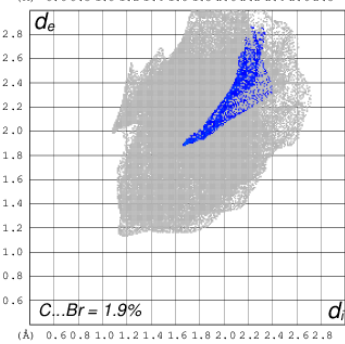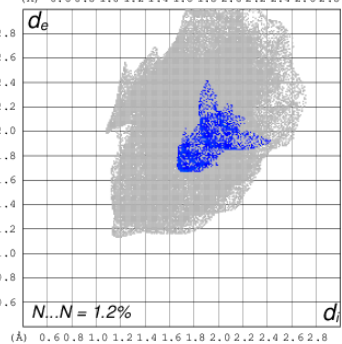

(a)

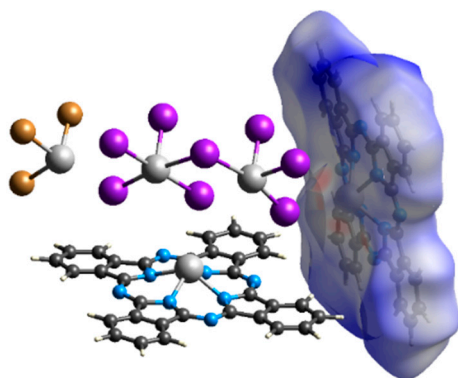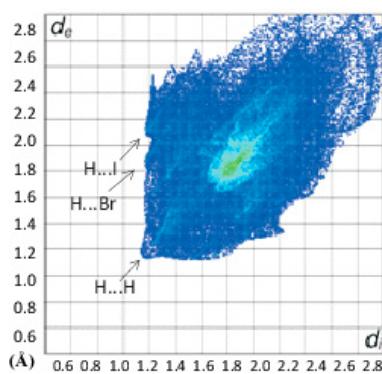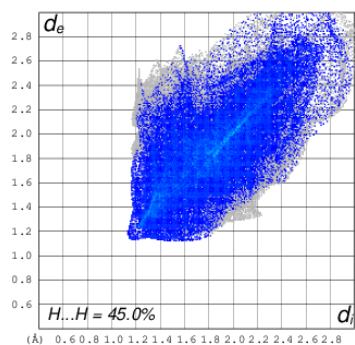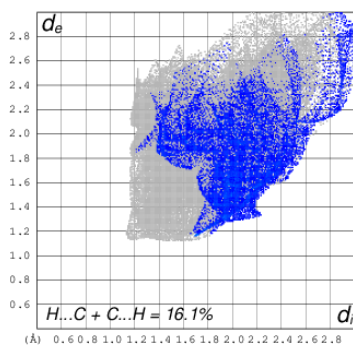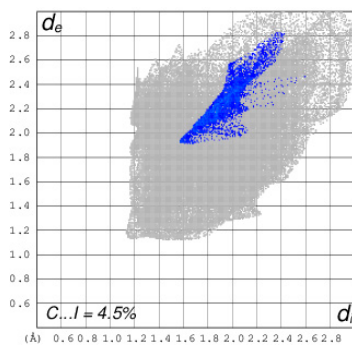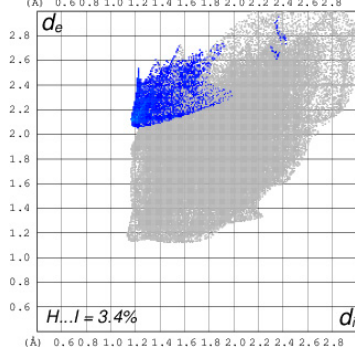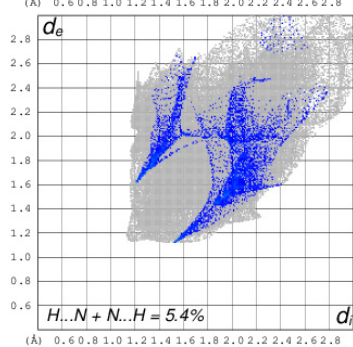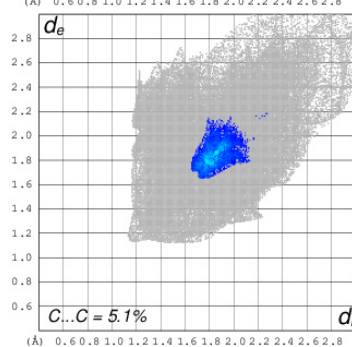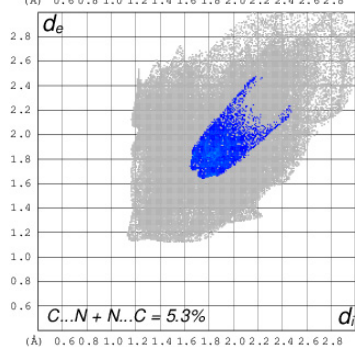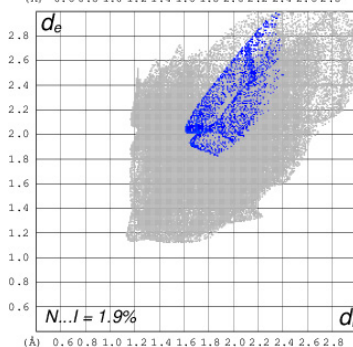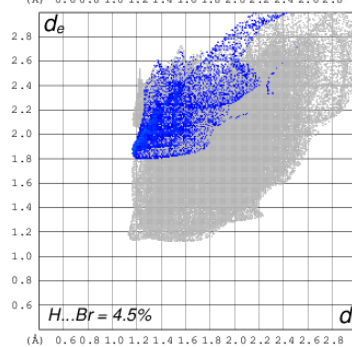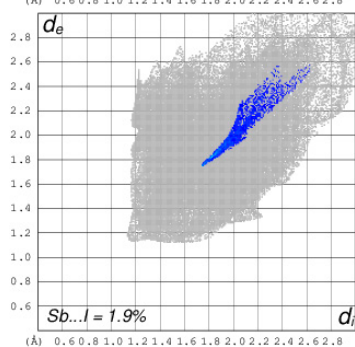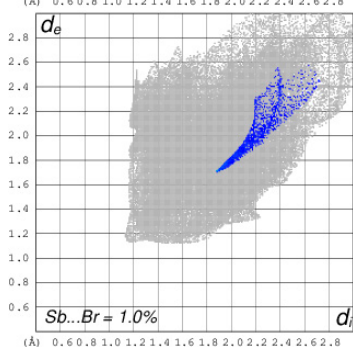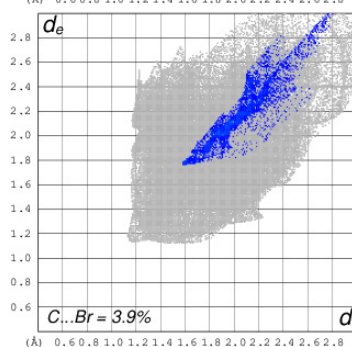

(b)



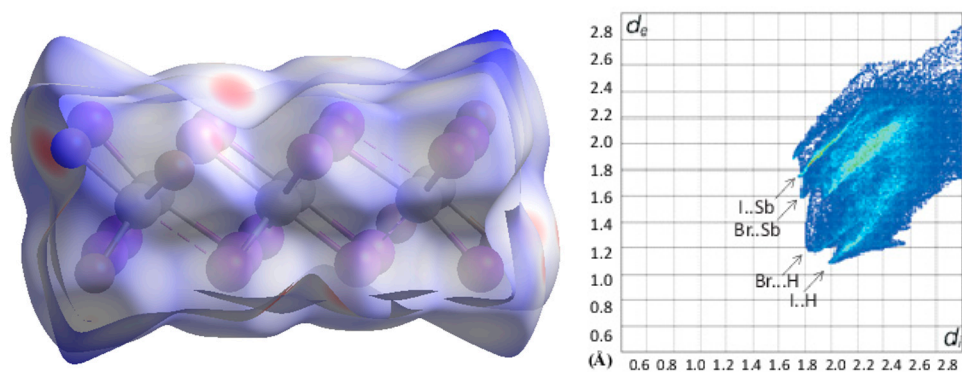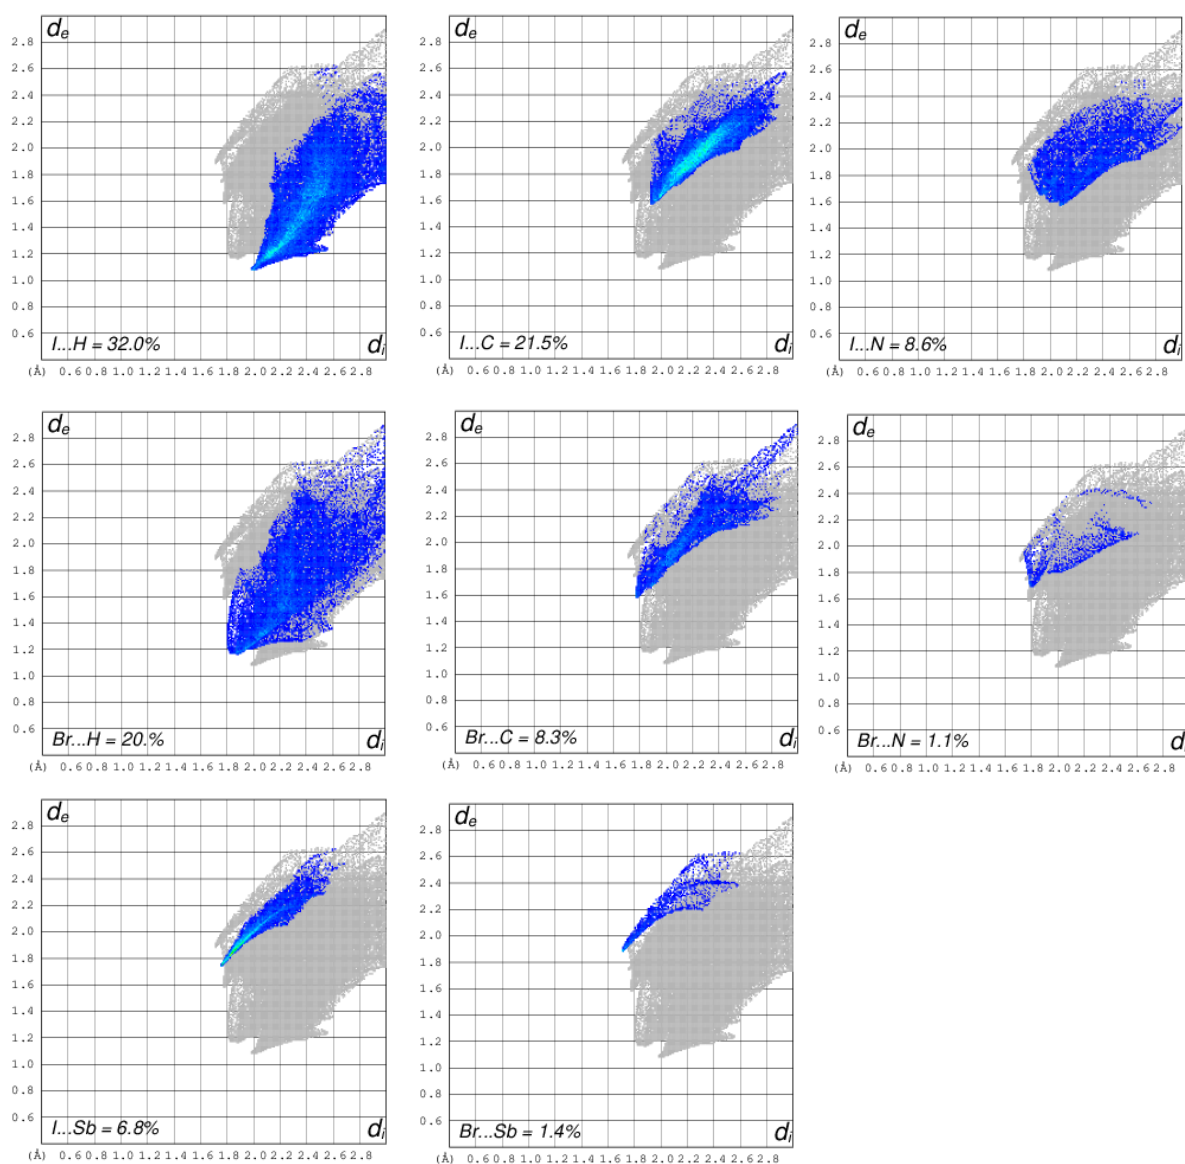

(c)

**Figure S2.** (a) The deconvolution of the 2D fingerprint plot illustrating the percentage of the respective interactions in the HS for (SbPc)<sup>+</sup> unit with Sb4 in crystal **1**. (b) The deconvolution of the 2D fingerprint plot illustrating the percentage of the respective interactions in the HS for (SbPc)<sup>+</sup> unit with Sb4B in crystal **1**. (c) The deconvolution of the 2D fingerprint plot illustrating the percentage of the respective interactions in the HS for (Sb<sub>6</sub>I<sub>16</sub>Br<sub>6</sub>)<sup>4-</sup> anionic unit in crystal **1**.
